# Supplementary material
Source: PubMed Central journal article supplement (PMC3718156)
Supplement: 1305559110_pnas.201305559SI.pdf [file 1305559110_pnas.201305559SI.pdf]

# Supporting Information

Sheppard et al. 10.1073/pnas.1305559110

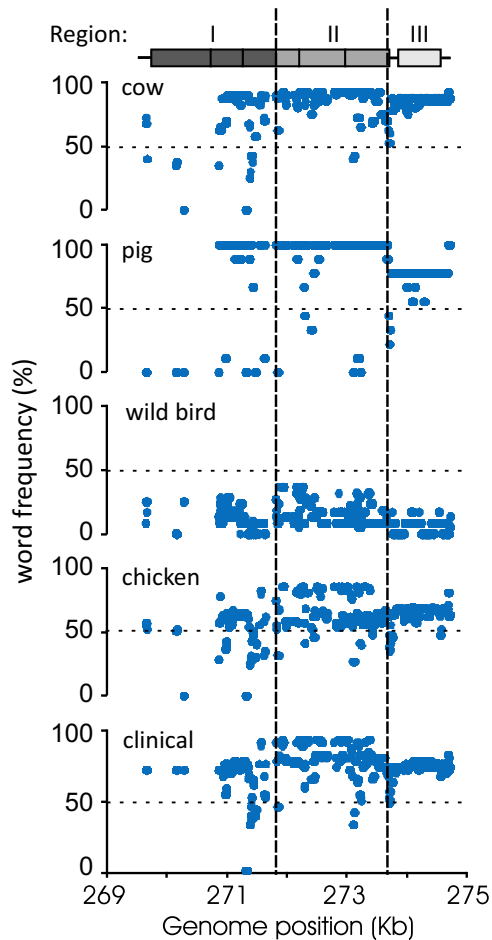

**Fig. S1.** Distribution of cattle-associated words in isolates from a different host. Words identified in the largest host-associated region in sequence type (ST)-45 complex isolates were quantified in isolates from other clonal complexes. The number of host-associated words that map to the DNA sequence across the main host cattle-associated island (region 3) was determined for each isolate. The percentage of isolates containing cattle-associated words is shown graphically for each isolate host group. (*Top to Bottom*) These include cow, pig, wild bird, chicken, and clinical samples. For each host graph, a horizontal line shows the level if 50% of the isolates contain the word. Three regions (I–III) are identified based on the relative frequency of words.

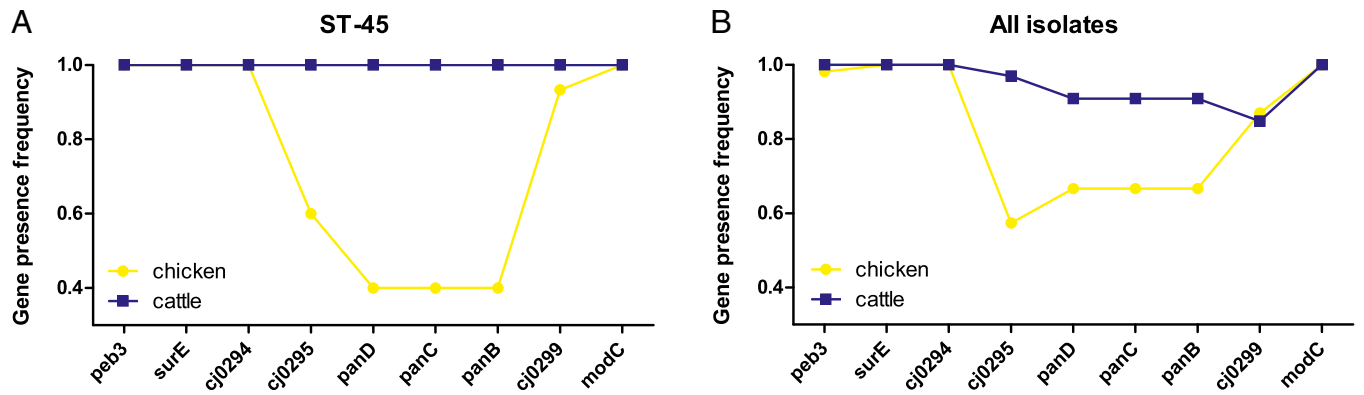

**Fig. S2.** Prevalence of genes from the host-associated island in cattle- and chicken-associated *Campylobacter jejuni* isolates from the ST-45 clonal complex (**A**;  $n = 22$ ) and from all isolates sequenced in this study (**B**). Prevalence in cattle-associated isolates is indicated by the blue lines, and that in chicken-associated isolates is indicated by the yellow lines. (Left to Right) The order of genes is inferred based on synteny in *C. jejuni* reference strain 11168 at this locus. The presence or absence of the genes was defined using the BLAST function in the Bacterial Isolate Genome Sequence Database, with present genes defined as having a minimum of 70% sequence identity and 50% alignment length.

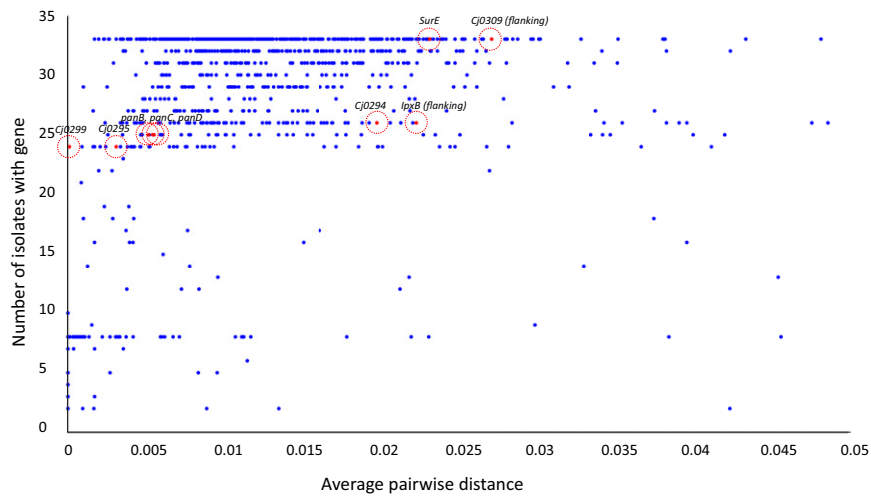

**Fig. S3.** Scatter plot showing the genes contained in the main host-associated region in red and all 1,028 genes found in some but not all the genomes in blue. The x axis represents the average distance between isolates in which the genes were found, and the y axis shows the number of genomes in which the gene was found.

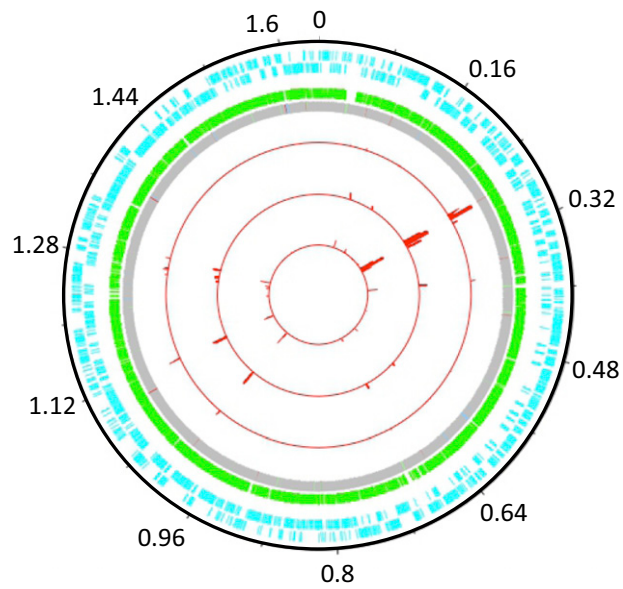

**Fig. 54.** Distribution of host-associated words with a length of 20 bp (outer ring), 30 bp (middle ring), and 40 bp (inner ring) mapped on the reference genome NCTC11168. This figure was prepared using Artemis (1) and DNAPlotter (2).

1. Rutherford K, et al. (2000) Artemis: Sequence visualization and annotation. *Bioinformatics* 16(10):944–945.
2. Carver T, Thomson N, Bleasby A, Berriman M, Parkhill J (2009) DNAPlotter: Circular and linear interactive genome visualization. *Bioinformatics* 25(1):119–120.

**Table S1. Isolate details**

| Isolate | Aliases*       | <i>Campylobacter</i> species | ST <sup>†</sup> | CC <sup>‡</sup> | Clade | Total length, bp | Source   |
|---------|----------------|------------------------------|-----------------|-----------------|-------|------------------|----------|
| 4       | C8, H042160062 | <i>C. jejuni</i>             | 45              | 45              | —     | 1,596,969        | Chicken  |
| 13      | 7802A          | <i>C. jejuni</i>             | 61              | 61              | —     | 1,551,351        | Cattle   |
| 14      | PH325          | <i>C. jejuni</i>             | 2,381           | —               | —     | 1,543,877        | Water    |
| 22      | 48321          | <i>C. jejuni</i>             | 257             | 257             | —     | 1,573,736        | Chicken  |
| 26      | NC_009839      | <i>C. jejuni</i>             | 267             | 283             | —     | 1,628,115        | Clinical |
| 27      | NC_008787      | <i>C. jejuni</i>             | 604             | 42              | —     | 1,616,554        | Clinical |
| 28      | NC_003912      | <i>C. jejuni</i>             | 354             | 354             | —     | 1,777,831        | Clinical |
| 29      | NC_002163      | <i>C. jejuni</i>             | 43              | 21              | —     | 1,641,481        | Clinical |
| 30      | 7487           | <i>C. jejuni</i>             | 1,044           | 658             | —     | 1,613,621        | Clinical |
| 32      | 45             | <i>C. jejuni</i>             | 11              | 45              | —     | 1,650,105        | Clinical |
| 34      | 526            | <i>C. jejuni</i>             | 262             | 21              | —     | 1,643,032        | Clinical |
| 36      | 2850           | <i>C. jejuni</i>             | 266             | 21              | —     | 1,695,272        | Clinical |
| 37      | 5075           | <i>C. jejuni</i>             | 883             | 21              | —     | 1,667,560        | Clinical |
| 39      | 6618B          | <i>C. jejuni</i>             | 2,219           | 45              | —     | 1,616,482        | Chicken  |
| 40      | 7030A2         | <i>C. jejuni</i>             | 21              | 21              | —     | 1,726,327        | Chicken  |
| 42      | 7620           | <i>C. jejuni</i>             | 42              | 42              | —     | 1,672,737        | Cattle   |
| 43      | 7511           | <i>C. jejuni</i>             | 51              | 443             | —     | 2,069,686        | Chicken  |
| 45      | 7648-2         | <i>C. jejuni</i>             | 583             | 45              | —     | 1,609,163        | Chicken  |
| 48      | 7938-1         | <i>C. jejuni</i>             | 206             | 206             | —     | 1,671,619        | Cattle   |
| 49      | 8058           | <i>C. jejuni</i>             | 38              | 48              | —     | 1,663,148        | Cattle   |
| 52      | 8697           | <i>C. jejuni</i>             | 334             | 45              | —     | 1,616,567        | Cattle   |
| 54      | 6760           | <i>C. jejuni</i>             | 267             | 283             | —     | 1,591,217        | Chicken  |
| 55      | 4153           | <i>C. jejuni</i>             | 230             | 45              | —     | 1,625,711        | Clinical |
| 56      | 7816           | <i>C. jejuni</i>             | 45              | 45              | —     | 1,607,778        | Cattle   |
| 57      | 6764           | <i>C. jejuni</i>             | 334             | 45              | —     | 1,620,325        | Chicken  |
| 59      | 8464           | <i>C. jejuni</i>             | 21              | 21              | —     | 1,705,325        | Cattle   |
| 60      | 274            | <i>C. jejuni</i>             | 53              | 21              | —     | 1,658,292        | Clinical |
| 62      | 8606           | <i>C. jejuni</i>             | 21              | 21              | —     | 1,658,436        | Cattle   |
| 63      | 7366           | <i>C. jejuni</i>             | 21              | 21              | —     | 1,679,349        | Chicken  |
| 64      | 7031           | <i>C. jejuni</i>             | 814             | 661             | —     | 1,698,035        | Chicken  |
| 65      | 10040          | <i>C. jejuni</i>             | 104             | 21              | —     | 1,761,202        | Chicken  |
| 66      | S07-4547       | <i>C. jejuni</i>             | 353             | 353             | —     | 1,776,210        | Chicken  |
| 67      | 508-2669       | <i>C. jejuni</i>             | 354             | 354             | —     | 1,688,706        | Chicken  |
| 68      | 508-3501       | <i>C. jejuni</i>             | 573             | 573             | —     | 1,838,022        | Chicken  |
| 69      | 508-3789       | <i>C. jejuni</i>             | 2,568           | 661             | —     | 1,821,236        | Chicken  |
| 70      | 508-2426       | <i>C. jejuni</i>             | 45              | 45              | —     | 1,595,762        | Chicken  |
| 71      | 508-3754       | <i>C. jejuni</i>             | 50              | 21              | —     | 1,689,713        | Chicken  |
| 72      | S07-0761       | <i>C. jejuni</i>             | 50              | 21              | —     | 1,692,341        | Chicken  |
| 73      | S07-2406       | <i>C. jejuni</i>             | 53              | 21              | —     | 1,651,079        | Chicken  |
| 74      | S07-1597       | <i>C. jejuni</i>             | 262             | 21              | —     | 1,606,379        | Chicken  |
| 75      | S08-0575       | <i>C. jejuni</i>             | 266             | 21              | —     | 1,693,845        | Chicken  |
| 77      | 508-2543       | <i>C. jejuni</i>             | 50              | 21              | —     | 1,692,435        | Chicken  |
| 78      | 508-2574       | <i>C. jejuni</i>             | 50              | 21              | —     | 1,693,941        | Chicken  |
| 79      | 508-2327       | <i>C. jejuni</i>             | 11              | 45              | —     | 1,645,238        | Chicken  |
| 80      | S07-0533       | <i>C. jejuni</i>             | 2,030           | 257             | —     | 1,734,017        | Chicken  |
| 81      | S07-0175       | <i>C. jejuni</i>             | 1,003           | 45              | —     | 1,617,200        | Chicken  |
| 82      | S07-S237       | <i>C. jejuni</i>             | 45              | 45              | —     | 1,631,119        | Chicken  |
| 83      | 508-2836       | <i>C. jejuni</i>             | 354             | 354             | —     | 1,667,030        | Chicken  |
| 84      | 508-2944       | <i>C. jejuni</i>             | 45              | 45              | —     | 1,605,483        | Chicken  |
| 85      | 97             | <i>C. jejuni</i>             | 3,583           | 42              | —     | 1,654,563        | Cattle   |
| 86      | 82             | <i>C. jejuni</i>             | 61              | 61              | —     | 1,659,558        | Cattle   |
| 87      | 158            | <i>C. jejuni</i>             | 273             | 206             | —     | 1,715,399        | Cattle   |
| 88      | 111            | <i>C. jejuni</i>             | 270             | 403             | —     | 1,716,038        | Cattle   |
| 89      | 185            | <i>C. jejuni</i>             | 21              | 21              | —     | 1,659,711        | Cattle   |
| 90      | 113            | <i>C. jejuni</i>             | 45              | 45              | —     | 1,603,131        | Cattle   |
| 91      | 218            | <i>C. jejuni</i>             | 45              | 45              | —     | 1,602,224        | Cattle   |
| 92      | 222            | <i>C. jejuni</i>             | 45              | 45              | —     | 1,607,691        | Cattle   |
| 94      | 195            | <i>C. jejuni</i>             | 104             | 21              | —     | 1,762,939        | Cattle   |
| 96      | 77             | <i>C. jejuni</i>             | 61              | 61              | —     | 1,894,874        | Cattle   |
| 97      | 87             | <i>C. jejuni</i>             | 19              | 21              | —     | 1,629,692        | Cattle   |
| 99      | 130            | <i>C. jejuni</i>             | 206             | 206             | —     | 1,720,953        | Cattle   |
| 100     | 124            | <i>C. jejuni</i>             | 137             | 45              | —     | 1,626,334        | Cattle   |
| 102     | 165            | <i>C. jejuni</i>             | 583             | 45              | —     | 1,607,515        | Cattle   |

Table S1. Cont.

| Isolate | Aliases*      | <i>Campylobacter</i> species | ST <sup>†</sup> | CC <sup>‡</sup> | Clade | Total length, bp | Source   |
|---------|---------------|------------------------------|-----------------|-----------------|-------|------------------|----------|
| 103     | 39            | <i>C. jejuni</i>             | 334             | 45              | —     | 1,641,790        | Cattle   |
| 104     | 234           | <i>C. jejuni</i>             | 45              | 45              | —     | 1,654,338        | Cattle   |
| 105     | F7A20         | <i>C. jejuni</i>             | 257             | 257             | —     | 1,697,013        | Chicken  |
| 106     | F2B7          | <i>C. jejuni</i>             | 51              | 443             | —     | 1,714,044        | Chicken  |
| 107     | F6_8          | <i>C. jejuni</i>             | 1,079           | 573             | —     | 1,838,061        | Chicken  |
| 108     | F10A2         | <i>C. jejuni</i>             | 574             | 574             | —     | 1,743,461        | Chicken  |
| 109     | F8C6          | <i>C. jejuni</i>             | 814             | 661             | —     | 1,759,789        | Chicken  |
| 110     | F12B1         | <i>C. jejuni</i>             | 21              | 21              | —     | 1,656,261        | Chicken  |
| 111     | F4A6          | <i>C. jejuni</i>             | 45              | 45              | —     | 1,649,834        | Chicken  |
| 112     | F7C3          | <i>C. jejuni</i>             | 45              | 45              | —     | 1,618,948        | Chicken  |
| 113     | F7B1          | <i>C. jejuni</i>             | 883             | 21              | —     | 1,665,144        | Chicken  |
| 114     | F9C2          | <i>C. jejuni</i>             | 230             | 45              | —     | 1,633,592        | Chicken  |
| 116     | 585           | <i>C. jejuni</i>             | 21              | 21              | —     | 1,656,471        | Clinical |
| 117     | 3             | <i>C. jejuni</i>             | 21              | 21              | —     | 1,697,696        | Clinical |
| 119     | 5             | <i>C. jejuni</i>             | 45              | 45              | —     | 1,621,668        | Clinical |
| 122     | CT43850       | <i>C. jejuni</i>             | 177             | 177             | —     | 1,582,720        | Starling |
| 124     | CT86857_2.6.4 | <i>C. jejuni</i>             | 45              | 45              | —     | 1,603,669        | Starling |
| 125     | CL95044_4.6.4 | <i>C. jejuni</i>             | 1,020           | 682             | —     | 1,578,916        | Starling |
| 126     | Goose255      | <i>C. jejuni</i>             | 1,033           | 1,034           | —     | 1,663,834        | Goose    |
| 127     | Goose122      | <i>C. jejuni</i>             | 45              | 45              | —     | 1,538,093        | Goose    |
| 128     | Goose95       | <i>C. jejuni</i>             | 137             | 45              | —     | 1,600,143        | Goose    |
| 129     | Goose3        | <i>C. jejuni</i>             | 696             | 1,332           | —     | 1,561,449        | Goose    |
| 130     | Duck229       | <i>C. jejuni</i>             | 702             | 702             | —     | 1,669,953        | Duck     |
| 131     | Duck184       | <i>C. jejuni</i>             | 45              | 45              | —     | 1,616,162        | Duck     |
| 172     | Cj129-258     | <i>C. jejuni</i>             | 459             | 42              | —     | 1,643,841        | Cattle   |
| 173     | Cj51494       | <i>C. jejuni</i>             | 4,834           | 353             | —     | 1,799,590        | Chicken  |
| 174     | CjLMG23216    | <i>C. jejuni</i>             | 4,835           | —               | —     | 1,708,741        | Chicken  |
| 175     | CjLMG23218    | <i>C. jejuni</i>             | 48              | 48              | —     | 1,677,541        | Chicken  |
| 176     | CjLMG23223    | <i>C. jejuni</i>             | 791             | —               | —     | 1,701,738        | Chicken  |
| 177     | CjLMG23263    | <i>C. jejuni</i>             | 3,504           | 446             | —     | 1,739,638        | Chicken  |
| 178     | Cj60004       | <i>C. jejuni</i>             | 4,836           | —               | —     | 1,674,182        | Chicken  |
| 179     | CjLMG23264    | <i>C. jejuni</i>             | 46              | 206             | —     | 1,719,111        | Clinical |
| 180     | CjLMG23269    | <i>C. jejuni</i>             | 4,837           | 353             | —     | 1,735,582        | Chicken  |
| 181     | Cj55037       | <i>C. jejuni</i>             | 45              | 45              | —     | 1,598,300        | Chicken  |
| 182     | CjLMG9879     | <i>C. jejuni</i>             | 47              | 21              | —     | 1,650,086        | Clinical |
| 183     | Cj86605       | <i>C. jejuni</i>             | 4,840           | 48              | —     | 1,637,051        | Chicken  |
| 184     | CjLMG23357    | <i>C. jejuni</i>             | 4,883           | 1,275           | —     | 1,694,896        | Clinical |
| 185     | CjATCC33560T  | <i>C. jejuni</i>             | 403             | 403             | —     | 1,714,676        | Cattle   |
| 186     | CjLMG9081     | <i>C. jejuni</i>             | 52              | 52              | —     | 1,593,688        | Clinical |
| 187     | Cj53161       | <i>C. jejuni</i>             | 4,838           | 353             | —     | 1,730,741        | Chicken  |
| 188     | CjLMG9217     | <i>C. jejuni</i>             | 443             | 443             | —     | 1,663,474        | Clinical |
| 189     | Cj2008-1025   | <i>C. jejuni</i>             | 50              | 21              | —     | 1,656,768        | Clinical |
| 190     | Cj2008-894    | <i>C. jejuni</i>             | 1,962           | —               | —     | 1,627,102        | Clinical |
| 191     | Cj2008-872    | <i>C. jejuni</i>             | 61              | 61              | —     | 1,605,881        | Clinical |
| 192     | Cj2008-988    | <i>C. jejuni</i>             | 572             | 206             | —     | 1,818,384        | Clinical |
| 193     | Cj1997-1      | <i>C. jejuni</i>             | 658             | 658             | —     | 1,603,628        | Clinical |
| 194     | Cj2008-979    | <i>C. jejuni</i>             | 2,274           | —               | —     | 1,798,587        | Clinical |
| 195     | Cj2008-831    | <i>C. jejuni</i>             | 50              | 21              | —     | 1,606,170        | Clinical |
| 196     | Cj1997-4      | <i>C. jejuni</i>             | 475             | 48              | —     | 1,669,690        | Clinical |
| 197     | Cj1997-7      | <i>C. jejuni</i>             | 61              | 61              | —     | 1,633,444        | Clinical |
| 198     | Cj1997-10     | <i>C. jejuni</i>             | 4,839           | —               | —     | 1,791,227        | Clinical |
| 199     | Cj1997-11     | <i>C. jejuni</i>             | 22              | 22              | —     | 1,598,427        | Clinical |
| 200     | Cj1997-14     | <i>C. jejuni</i>             | 5,159           | 353             | —     | 1,767,166        | Clinical |
| 201     | Cj51037       | <i>C. jejuni</i>             | 939             | 353             | —     | 1,747,053        | Chicken  |
| 202     | Cj110-21      | <i>C. jejuni</i>             | 982             | 21              | —     | 1,615,152        | Cattle   |
| 203     | Cj87330       | <i>C. jejuni</i>             | 50              | 21              | —     | 1,618,859        | Chicken  |
| 204     | Cj87459       | <i>C. jejuni</i>             | 452             | 353             | —     | 1,772,922        | Chicken  |
| 205     | Cj140-16      | <i>C. jejuni</i>             | 5,161           | 61              | —     | 1,677,874        | Cattle   |
| 206     | Cj1213        | <i>C. jejuni</i>             | 132             | 508             | —     | 1,673,339        | Cattle   |
| 207     | CjATCC43432   | <i>C. jejuni</i>             | 122             | 206             | —     | 1,703,446        | Clinical |
| 208     | Cj1798        | <i>C. jejuni</i>             | 61              | 61              | —     | 1,604,776        | Cattle   |
| 209     | Cj1854        | <i>C. jejuni</i>             | 922             | —               | —     | 1,619,643        | Cattle   |

Table S1. Cont.

| Isolate | Aliases*          | <i>Campylobacter</i> species | ST <sup>†</sup> | CC <sup>‡</sup> | Clade | Total length, bp | Source   |
|---------|-------------------|------------------------------|-----------------|-----------------|-------|------------------|----------|
| 210     | Cj1893            | <i>C. jejuni</i>             | 38              | 48              | —     | 1,700,567        | Cattle   |
| 211     | Cj1928            | <i>C. jejuni</i>             | 806             | 21              | —     | 1,744,799        | Cattle   |
| 212     | CjLMG9872         | <i>C. jejuni</i>             | 677             | 677             | —     | 1,619,961        | Clinical |
| 213     | Cj23210           | <i>C. jejuni</i>             | 380             | —               | —     | 1,762,534        | Chicken  |
| 214     | CjLMG23211        | <i>C. jejuni</i>             | 220             | 179             | —     | 1,669,921        | Chicken  |
| 2       | 171, F79015       | <i>C. coli</i>               | 867             | 828             | 1     | 1,678,444        | Clinical |
| 5       | 8993-2D           | <i>C. coli</i>               | 2,696           | —               | 1     | 1,589,408        | Pig      |
| 15      | Pig faeces1, PW1  | <i>C. coli</i>               | 887             | 828             | 1     | 1,594,196        | Pig      |
| 17      | C138, H044280266  | <i>C. coli</i>               | 867             | 828             | 1     | 1,633,576        | Chicken  |
| 18      | 151B, B51, C28    | <i>C. coli</i>               | 3,667           | 1,150           | 1     | 1,618,028        | Chicken  |
| 19      | 182               | <i>C. coli</i>               | 2,177           | 828             | 1     | 1,678,945        | Clinical |
| 20      | C4B19             | <i>C. coli</i>               | 1,487           | 1,150           | 1     | 1,505,418        | Chicken  |
| 21      | C4 B30            | <i>C. coli</i>               | 828             | 828             | 1     | 1,566,888        | Chicken  |
| 23      | 8866, Duck323     | <i>C. coli</i>               | 3,311           | —               | 1     | 1,431,051        | Duck     |
| 24      | BB 2617           | <i>C. coli</i>               | 828             | 828             | 1     | 1,570,976        | Chicken  |
| 25      | 911               | <i>C. coli</i>               | 3,136           | —               | 1     | 1,657,253        | Clinical |
| 44      | 7613-2            | <i>C. coli</i>               | 1,009           | —               | 1     | 1,696,727        | Chicken  |
| 98      | 156               | <i>C. coli</i>               | 827             | 828             | 1     | 1,700,098        | Cattle   |
| 132     | Cc111-3           | <i>C. coli</i>               | 1,467           | 828             | 1     | 1,784,160        | Pig      |
| 133     | Cc90-3            | <i>C. coli</i>               | 3,862           | —               | 1     | 1,763,407        | Pig      |
| 134     | CcZ163            | <i>C. coli</i>               | 3,336           | 828             | 1     | 1,676,266        | Chicken  |
| 135     | Cc2548            | <i>C. coli</i>               | 1,167           | —               | 1     | 1,855,950        | Chicken  |
| 136     | Cc2553            | <i>C. coli</i>               | 825             | 828             | 1     | 1,822,898        | Chicken  |
| 137     | Cc2680            | <i>C. coli</i>               | 3,872           | 828             | 1     | 1,817,347        | Chicken  |
| 138     | Cc2685            | <i>C. coli</i>               | 1,082           | 828             | 1     | 1,761,587        | Chicken  |
| 139     | Cc2688            | <i>C. coli</i>               | 1,017           | 828             | 1     | 1,797,366        | Chicken  |
| 140     | Cc2692            | <i>C. coli</i>               | 860             | 828             | 1     | 1,764,946        | Chicken  |
| 141     | Cc2698            | <i>C. coli</i>               | 829             | 828             | 1     | 1,808,789        | Chicken  |
| 142     | Cc84-2            | <i>C. coli</i>               | 1,113           | 828             | 1     | 1,700,441        | Pig      |
| 143     | Cc80352           | <i>C. coli</i>               | 1,017           | 828             | 1     | 1,948,336        | Chicken  |
| 144     | Cc86119           | <i>C. coli</i>               | 825             | 828             | 1     | 1,737,119        | Chicken  |
| 145     | Cc1091            | <i>C. coli</i>               | 1,068           | 828             | 1     | 1,654,669        | Cattle   |
| 146     | Cc1098            | <i>C. coli</i>               | 1,104           | 828             | 1     | 1,765,589        | Cattle   |
| 147     | Cc1148            | <i>C. coli</i>               | 1,068           | 828             | 1     | 1,702,760        | Cattle   |
| 148     | Cc1417            | <i>C. coli</i>               | 3,221           | 828             | 1     | 1,773,147        | Cattle   |
| 149     | Cc132-6           | <i>C. coli</i>               | 3,221           | 828             | 1     | 1,773,147        | Pig      |
| 150     | Cc1891            | <i>C. coli</i>               | 1,068           | 828             | 1     | 1,654,803        | Cattle   |
| 151     | Cc1909            | <i>C. coli</i>               | 1,104           | 828             | 1     | 1,705,267        | Cattle   |
| 152     | Cc59-2            | <i>C. coli</i>               | 890             | 828             | 1     | 1,764,317        | Pig      |
| 153     | Cc1948            | <i>C. coli</i>               | 1,104           | 828             | 1     | 1,703,540        | Cattle   |
| 154     | Cc1957            | <i>C. coli</i>               | 2,698           | 828             | 1     | 1,826,730        | Cattle   |
| 155     | Cc1961            | <i>C. coli</i>               | 1,104           | 828             | 1     | 1,770,268        | Cattle   |
| 156     | Cc202/04          | <i>C. coli</i>               | 1,585           | 828             | 1     | 1,674,643        | Clinical |
| 157     | Cc67-8            | <i>C. coli</i>               | 1,061           | 828             | 1     | 1,856,922        | Pig      |
| 158     | Cc317/04          | <i>C. coli</i>               | 5,160           | 1,150           | 1     | 1,751,938        | Clinical |
| 159     | CcLMG9854         | <i>C. coli</i>               | 1,068           | 828             | 1     | 1,716,566        | Clinical |
| 160     | CcLMG23336        | <i>C. coli</i>               | 3,868           | 828             | 1     | 1,664,441        | Clinical |
| 161     | CcLMG23341        | <i>C. coli</i>               | 855             | 828             | 1     | 1,616,262        | Clinical |
| 162     | CcLMG23342        | <i>C. coli</i>               | 855             | 828             | 1     | 1,623,541        | Clinical |
| 163     | CcLMG23344        | <i>C. coli</i>               | 1,586           | 828             | 1     | 1,798,140        | Clinical |
| 164     | Cc151-9           | <i>C. coli</i>               | 1,102           | —               | 1     | 1,680,175        | Pig      |
| 165     | CcLMG9853         | <i>C. coli</i>               | 3,869           | 828             | 1     | 1,667,176        | Clinical |
| 166     | CcLMG9860         | <i>C. coli</i>               | 900             | —               | 1     | 1,849,541        | Clinical |
| 167     | CcH6              | <i>C. coli</i>               | 3,020           | 828             | 1     | 1,712,639        | Clinical |
| 168     | CcH8              | <i>C. coli</i>               | 901             | 828             | 1     | 1,804,264        | Clinical |
| 169     | CcH9              | <i>C. coli</i>               | 825             | 828             | 1     | 1,673,028        | Clinical |
| 170     | CcH56             | <i>C. coli</i>               | 1,096           | 828             | 1     | 1,737,522        | Clinical |
| 171     | CcZ156            | <i>C. coli</i>               | 854             | 828             | 1     | 1,716,763        | Chicken  |
| 1       | 182, 8808         | <i>C. coli</i>               | 2,015           | —               | 2     | 1,752,685        | Duck     |
| 10      | DFVF 1656, EL1656 | <i>C. coli</i>               | 1,572           | —               | 2     | 1,660,889        | Chicken  |
| 11      | 6873-B            | <i>C. coli</i>               | 2,016           | —               | 2     | 1,606,337        | Duck     |
| 12      | 2544              | <i>C. coli</i>               | 2,326           | —               | 2     | 1,554,713        | Clinical |

**Table S1. Cont.**

| Isolate | Aliases*          | <i>Campylobacter</i> species | ST <sup>†</sup> | CC <sup>‡</sup> | Clade | Total length, bp | Source   |
|---------|-------------------|------------------------------|-----------------|-----------------|-------|------------------|----------|
| 3       | 316, FSA05.280042 | <i>C. coli</i>               | 1,992           |                 | 3     | 1,624,910        | Water    |
| 6       | 8096              | <i>C. coli</i>               | 2,681           |                 | 3     | 1,542,097        | Chicken  |
| 7       | DFVF1912, EL1912  | <i>C. coli</i>               | 1,576           |                 | 3     | 1,521,545        | Chicken  |
| 8       | 4944              | <i>C. coli</i>               | 1,670           |                 | 3     | 1,547,646        | Clinical |
| 9       | RM4931            | <i>C. coli</i>               | 1,643           |                 | 3     | 1,500,025        | Clinical |

\*Isolates with aliases beginning with NC, Cj, and Cc are from a published study (1).

<sup>†</sup>Sequence type (ST) was derived from the allelic profile of seven housekeeping genes by multilocus sequence typing (MLST).

<sup>‡</sup>Clonal complex (CC) is defined as including any ST that matches a previously defined central genotype (<http://pubmlst.org/campylobacter/>) at three or more loci.

1. Lefébure T, Bitar PD, Suzuki H, Stanhope MJ (2010) Evolutionary dynamics of complete *Campylobacter* pan-genomes and the bacterial species concept. *Genome Biol Evol* 2:646–655.

**Table S2. List of gene loci with host association signal based on ST-45 analysis**

| Gene name*            | No. of word matches | Description                                                                                                                                                                                                                                       |
|-----------------------|---------------------|---------------------------------------------------------------------------------------------------------------------------------------------------------------------------------------------------------------------------------------------------|
| <i>Cj0030</i>         | 6                   | Hypothetical protein                                                                                                                                                                                                                              |
| <i>Cj0044c</i>        | 26                  | Hypothetical protein                                                                                                                                                                                                                              |
| <i>Cj0067</i>         | 2                   | Cytosine deaminase and related metal-dependent hydrolases [nucleotide transport and metabolism/general function prediction only]; region: SsnA; COG0402                                                                                           |
| <i>atpH (Cj0104)</i>  | 2                   | ATP synthase delta (OSCP) subunit; region: OSCP; cl00491                                                                                                                                                                                          |
| <i>Cj0128c</i>        | 6                   | Putative inositol monophosphatase family protein                                                                                                                                                                                                  |
| <i>Cj0131</i>         | 14                  | Putative peptidase M23 family protein                                                                                                                                                                                                             |
| <i>Cj0133</i>         | 8                   | Putative glycoprotease family protein                                                                                                                                                                                                             |
| <i>Cj0143c</i>        | 28                  | Putative periplasmic solute binding protein for ABC transport system                                                                                                                                                                              |
| <i>miaA (Cj0166)</i>  | 32                  | tRNA $\delta(2)$ -isopentenylpyrophosphate transferase                                                                                                                                                                                            |
| <i>Cj0182</i>         | 8                   | Putative transporter                                                                                                                                                                                                                              |
| <i>Cj0189c</i>        | 18                  | Conserved hypothetical protein                                                                                                                                                                                                                    |
| <i>Cj0190c</i>        | 12                  | Conserved hypothetical protein                                                                                                                                                                                                                    |
| <i>Cj0256</i>         | 2                   | Putative sulfatase family protein                                                                                                                                                                                                                 |
| <i>pyrC (Cj0259)</i>  | 2                   | Dihydroorotase                                                                                                                                                                                                                                    |
| <i>Cj0262c</i>        | 7                   | Putative methyl-accepting chemotaxis signal transduction protein                                                                                                                                                                                  |
| <i>Cj0286c</i>        | 37                  | Hypothetical protein                                                                                                                                                                                                                              |
| <i>greA (Cj0287c)</i> | 158                 | Transcription elongation factor                                                                                                                                                                                                                   |
| <i>lpxB (Cj0288c)</i> | 1,056               | Lipid-A-disaccharide synthase                                                                                                                                                                                                                     |
| <i>surE (Cj0293)</i>  | 140                 | Stationary phase survival protein                                                                                                                                                                                                                 |
| <i>Cj0294</i>         | 236                 | Dinucleotide-using enzymes involved in molybdopterin and thiamine biosynthesis family 1                                                                                                                                                           |
| <i>Cj0295</i>         | 902                 | Putative acetyltransferase                                                                                                                                                                                                                        |
| <i>panD (Cj0296c)</i> | 218                 | Aspartate $\alpha$ -decarboxylase; converts L-aspartate to $\beta$ -alanine and provides the major route of $\beta$ -alanine production in bacteria. $\beta$ -Alanine is essential for the biosynthesis of pantothenate (vitamin B <sub>5</sub> ) |
| <i>panC (Cj0297c)</i> | 1,040               | Pantoate- $\beta$ -alanine ligase; catalyzes the formation of (R)-pantothenate from pantoate and $\beta$ -alanine                                                                                                                                 |
| <i>panB (Cj0298c)</i> | 1,450               | 3-Methyl-2-oxobutanoate hydroxymethyltransferase; catalyzes the formation of tetrahydrofolate and 2-dehydropantoate from 5,10-methylenetetrahydrofolate and 3-methyl-2-oxobutanoate                                                               |
| <i>Cj0299</i>         | 1,536               | Putative periplasmic $\beta$ -lactamase                                                                                                                                                                                                           |
| <i>modC (Cj0300c)</i> | 112                 | Putative molybdenum transport ATP-binding protein                                                                                                                                                                                                 |
| <i>Cj0309c</i>        | 216                 | Putative efflux protein                                                                                                                                                                                                                           |
| <i>Cj0310c</i>        | 124                 | Putative efflux protein                                                                                                                                                                                                                           |
| <i>polA (Cj0338c)</i> | 30                  | DNA polymerase I                                                                                                                                                                                                                                  |
| <i>trpE (Cj0345)</i>  | 8                   | Putative anthranilate synthase component I                                                                                                                                                                                                        |
| <i>cmeB (Cj0366c)</i> | 4                   | Inner membrane efflux transporter                                                                                                                                                                                                                 |
| <i>Cj0373</i>         | 20                  | 2-Hydroxyacid dehydrogenase; involved in the metabolism of aromatic amino acids                                                                                                                                                                   |
| <i>Cj0375</i>         | 20                  | Probable lipoprotein                                                                                                                                                                                                                              |
| <i>pyrF (Cj0381c)</i> | 2                   | Orotidine 5'-phosphate decarboxylase; type 1 subfamily; involved in last step of pyrimidine biosynthesis                                                                                                                                          |
| <i>Cj0419</i>         | 24                  | Putative histidine triad (HIT) family protein                                                                                                                                                                                                     |
| <i>Cj0426</i>         | 24                  | Putative ABC transporter ATP-binding protein                                                                                                                                                                                                      |
| <i>Cj0544</i>         | 20                  | Putative integral membrane protein                                                                                                                                                                                                                |
| <i>Cj0554</i>         | 12                  | Hypothetical protein                                                                                                                                                                                                                              |
| <i>Cj0581</i>         | 26                  | Dinucleoside polyphosphate hydrolase                                                                                                                                                                                                              |
| <i>Cj0600</i>         | 18                  | Hypothetical protein                                                                                                                                                                                                                              |
| <i>Cj0617</i>         | 10                  | Hypothetical protein                                                                                                                                                                                                                              |
| <i>recN (Cj0642)</i>  | 8                   | Putative DNA repair protein                                                                                                                                                                                                                       |
| <i>Cj0653c</i>        | 10                  | Putative aminopeptidase                                                                                                                                                                                                                           |
| <i>Cj0660c</i>        | 14                  | Putative transmembrane protein                                                                                                                                                                                                                    |
| <i>flgH (Cj0687c)</i> | 38                  | Flagellar basal body L-ring protein; part of the flagellar basal body that consists of four rings (L, P, S, and M) mounted on a central rod                                                                                                       |
| <i>Cj0692c</i>        | 4                   | Hypothetical protein                                                                                                                                                                                                                              |
| <i>rim (Cj0712)</i>   | 18                  | Putative 16S rRNA processing protein                                                                                                                                                                                                              |
| <i>Cj0735</i>         | 38                  | Putative periplasmic protein                                                                                                                                                                                                                      |
| <i>valS (Cj0775c)</i> | 6                   | Valyl-tRNA synthetase                                                                                                                                                                                                                             |
| <i>ruvA (Cj0799c)</i> | 2                   | Putative Holliday junction ATP-dependent DNA helicase                                                                                                                                                                                             |
| <i>thrC (Cj0812)</i>  | 6                   | Threonine synthase; catalyzes the formation of L-threonine from O-phospho-L-homoserine                                                                                                                                                            |
| <i>Cj0815</i>         | 3                   | Hypothetical protein                                                                                                                                                                                                                              |
| <i>dfp (Cj0822)</i>   | 26                  | Bifunctional phosphopantothoenylcysteine decarboxylase/phosphopantothenate synthase                                                                                                                                                               |
| <i>trmA (Cj0831c)</i> | 4                   | tRNA (uracil-5)-methyltransferase; catalyzes the formation of 5-methyl-uridine at position 54 in all tRNAs                                                                                                                                        |



Table S2. Cont.

| Gene name*            | No. of word matches | Description                                                                                                                                                                                                        |
|-----------------------|---------------------|--------------------------------------------------------------------------------------------------------------------------------------------------------------------------------------------------------------------|
| <i>gltX</i> (Cj0845c) | 2                   | Glutamylglutaminyl-tRNA synthetase; charges one glutamine molecule and pairs it with tRNA(Gln)                                                                                                                     |
| <i>Cj0848c</i>        | 20                  | Conserved hypothetical protein                                                                                                                                                                                     |
| <i>Cj0879c</i>        | 32                  | Putative periplasmic protein                                                                                                                                                                                       |
| <i>Cj0908</i>         | 2                   | Probable periplasmic protein                                                                                                                                                                                       |
| <i>Cj0937</i>         | 34                  | Putative integral membrane protein                                                                                                                                                                                 |
| <i>Cj0991c</i>        | 24                  | Putative oxidoreductase ferredoxin-type electron transport protein                                                                                                                                                 |
| <i>Cj1012c</i>        | 2                   | Hypothetical protein                                                                                                                                                                                               |
| <i>Cj1025c</i>        | 2                   | Hypothetical protein                                                                                                                                                                                               |
| <i>rpsF</i> (Cj1070)  | 354                 | 30S ribosomal protein S6                                                                                                                                                                                           |
| <i>leuS</i> (Cj1091c) | 22                  | Leucyl-tRNA synthetase                                                                                                                                                                                             |
| <i>pglK</i> (Cj1130c) | 4                   | Flippase                                                                                                                                                                                                           |
| <i>htrB</i> (Cj1134)  | 2                   | Lipid A biosynthesis lauroyl acyltransferase                                                                                                                                                                       |
| <i>Cj1172c</i>        | 6                   | Hypothetical protein                                                                                                                                                                                               |
| <i>cetA</i> (Cj1190c) | 264                 | Bipartate energy taxis response protein                                                                                                                                                                            |
| <i>ribA</i> (Cj1218c) | 4                   | Bifunctional 3,4-dihydroxy-2-butanone 4-phosphate synthase/GTP cyclohydrolase II protein                                                                                                                           |
| <i>Cj1226c</i>        | 24                  | Putative two-component sensor (histidine kinase)                                                                                                                                                                   |
| <i>htrA</i> (Cj1228c) | 6                   | Serine protease (protease Do)                                                                                                                                                                                      |
| <i>hspR</i> (Cj1230)  | 20                  | Heat shock transcriptional regulator                                                                                                                                                                               |
| <i>glyS</i> (Cj1234)  | 2                   | Glycyl-tRNA synthetase subunit $\beta$                                                                                                                                                                             |
| <i>Cj1257c</i>        | 2                   | Putative efflux pump                                                                                                                                                                                               |
| <i>tyrS</i> (Cj1271c) | 20                  | Tyrosyl-tRNA synthetase; catalyzes the formation of tyrosyl-tRNA(Tyr) from tyrosine and tRNA(Tyr)                                                                                                                  |
| <i>Cj1305c</i>        | 4                   | Hypothetical protein                                                                                                                                                                                               |
| <i>pseH</i> (Cj1313)  | 8                   | <i>N</i> -acetyltransferase specific for PseC product, UDP-4-amino-4,6-dideoxy- $\beta$ -L-AltNac                                                                                                                  |
| <i>hisH</i> (Cj1315c) | 34                  | Imidazole glycerol phosphate synthase subunit                                                                                                                                                                      |
| <i>Cj1321</i>         | 8                   | Putative transferase                                                                                                                                                                                               |
| <i>pseE</i> (Cj1337)  | 24                  | Uncharacterized protein conserved in bacteria                                                                                                                                                                      |
| <i>maf7</i> (Cj1342c) | 58                  | Motility accessory factor                                                                                                                                                                                          |
| <i>Cj1344c</i>        | 12                  | Putative DNA-binding/iron metalloprotein/AP endonuclease                                                                                                                                                           |
| <i>Cj1345c</i>        | 36                  | Putative periplasmic protein                                                                                                                                                                                       |
| <i>mobA</i> (Cj1350)  | 30                  | Putative molybdopterin-guanine dinucleotide biosynthesis protein                                                                                                                                                   |
| <i>ruvB</i> (Cj1362)  | 60                  | Holliday junction DNA helicase                                                                                                                                                                                     |
| <i>selA</i> (Cj1378)  | 6                   | Selenocysteine synthase; catalyzes the formation of selenocysteinyl-tRNA(Sec) from seryl-tRNA(Sec) and L-selenophosphate in selenoprotein biosynthesis                                                             |
| <i>hddA</i> (Cj1425c) | 2                   | Putative D-glycero-D-manno-heptose 7-phosphate kinase                                                                                                                                                              |
| <i>Cj1472c</i>        | 6                   | Hypothetical protein                                                                                                                                                                                               |
| <i>Cj1482c</i>        | 10                  | Hypothetical protein                                                                                                                                                                                               |
| <i>Cj1574c</i>        | 12                  | Hypothetical protein                                                                                                                                                                                               |
| <i>Cj1587c</i>        | 16                  | Multidrug transporter membrane component/ATP-binding component                                                                                                                                                     |
| <i>Cj1609</i>         | 4                   | Putative sulfate adenylyltransferase                                                                                                                                                                               |
| <i>map</i> (Cj1651c)  | 6                   | Methionine aminopeptidase; catalyzes the removal of N-terminal amino acids from peptides and arylamides; generally Co(II); however, activity has been shown for some methionine aminopeptidases with Zn, Fe, or Mn |
| <i>Cj1660</i>         | 2                   | Putative integral membrane protein                                                                                                                                                                                 |
| <i>Cj1662</i>         | 6                   | Putative integral membrane protein                                                                                                                                                                                 |
| <i>Cj1715</i>         | 8                   | Putative acetyltransferase                                                                                                                                                                                         |
| <i>Cj1720</i>         | 6                   | Hypothetical protein                                                                                                                                                                                               |

ABC, ATP-binding cassette; AltNac, N-acetyl- $\beta$ -L-altrosamine; AP, apurinic/aprimidinic; OSCP, oligomycin sensitivity conferral protein.

\*Gene names, numbering, and order are based on the *C. jejuni* strain 11168 annotation (1).

1. Parkhill J, et al. (2000) The genome sequence of the food-borne pathogen *Campylobacter jejuni* reveals hypervariable sequences. *Nature* 403(6770):665–668.

**Table S3. Summary table of the ST-45 complex host-associated words in the 10 adaptive regions**

| Hot spot | ST-45 complex host-associated regions |             |       | Presence in none of the ST-45 complex isolates, % |         |       |     |          |      |             |       |
|----------|---------------------------------------|-------------|-------|---------------------------------------------------|---------|-------|-----|----------|------|-------------|-------|
|          | Start point                           | Association | Words | Cow                                               | Chicken | Human | Pig | Starling | Duck | Environment | Goose |
| 1        | 83,876                                | Cow         | 48    | 22                                                | 14      | 18    | 0   | 100      | 7    | 3           | 11    |
| 2        | 145,627                               | Chicken     | 28    | 75                                                | 64      | 55    | 0   | 100      | 20   | 33          | 100   |
| 2        | 147,776                               | Cow         | 4     | 50                                                | 43      | 34    | 11  | 33       | 20   | 0           | 100   |
| 3        | 265,325                               | Chicken     | 218   | 73                                                | 66      | 61    | 17  | 74       | 12   | 22          | 50    |
| 3        | 264,454                               | Cow         | 7,307 | 72                                                | 54      | 73    | 70  | 2        | 10   | 7           | 23    |
| 4        | 385,105                               | Cow         | 60    | 35                                                | 3       | 14    | 0   | 47       | 20   | 53          | 97    |
| 5        | 603,857                               | Chicken     | 8     | 70                                                | 63      | 59    | 0   | 100      | 20   | 33          | 58    |
| 5        | 604,762                               | Cow         | 26    | 8                                                 | 0       | 2     | 0   | 0        | 0    | 0           | 38    |
| 6        | 689,597                               | Cow         | 38    | 0                                                 | 0       | 4     | 0   | 0        | 0    | 0           | 0     |
| 7        | 766,303                               | Cow         | 3     | 3                                                 | 2       | 2     | 0   | 0        | 0    | 0           | 0     |
| 8        | 1,005,181                             | Chicken     | 180   | 35                                                | 12      | 24    | 0   | 100      | 23   | 67          | 43    |
| 8        | 1,005,181                             | Cow         | 174   | 11                                                | 50      | 32    | 0   | 0        | 13   | 0           | 55    |
| 9        | 1,118,362                             | Chicken     | 222   | 10                                                | 13      | 12    | 33  | 19       | 14   | 34          | 46    |
| 9        | 1,118,362                             | Cow         | 46    | 23                                                | 45      | 49    | 11  | 0        | 15   | 0           | 58    |
| 10       | 1,275,209                             | Chicken     | 116   | 22                                                | 33      | 26    | 8   | 78       | 13   | 17          | 30    |
| 10       | 1,266,923                             | Cow         | 60    | 67                                                | 64      | 52    | 31  | 50       | 8    | 0           | 33    |
